# Supplementary material for: Evaluation of infectious diseases and clinical microbiology specialists’ preferences for hand hygiene: analysis using the multi-attribute utility theory and the analytic hierarchy process methods
Source: Springer Nature journal article supplement (doi:10.1186/s12911-017-0528-z), 2017-08-31
Supplement: MOESM1 [file 14960358]

**Supplementary File 1. The Questionnaire utilized in face-to-face interviews to collect expert opinions**

**Evaluation of Infectious Diseases and Clinical Microbiology Specialists' Preferences for Hand Hygiene**

1. Gender: F  / M
2. Age: \_\_\_\_\_
3. Institution: \_\_\_\_\_
4. Experience year: \_\_\_\_\_

This questionnaire is designed to evaluate the choice of infectious diseases and clinical microbiology specialists' preferences for hand hygiene. Please sign the most suitable method below.

| Criteria that affect the preferences for hand hygiene                                                                                                                                                                                                                                                                                                                                                                                                                                  | Preferences for Hand Hygiene |   |   |   |   |                                          |   |   |   |   |
|----------------------------------------------------------------------------------------------------------------------------------------------------------------------------------------------------------------------------------------------------------------------------------------------------------------------------------------------------------------------------------------------------------------------------------------------------------------------------------------|------------------------------|---|---|---|---|------------------------------------------|---|---|---|---|
|                                                                                                                                                                                                                                                                                                                                                                                                                                                                                        | Antimicrobial Soap and Water |   |   |   |   | Alcohol-based antiseptic solution (ABAS) |   |   |   |   |
|                                                                                                                                                                                                                                                                                                                                                                                                                                                                                        | 1                            | 2 | 3 | 4 | 5 | 1                                        | 2 | 3 | 4 | 5 |
| <b>1. Short time application:</b> Washing the hands with antimicrobial soap and water must be at least 40 to 60 seconds rubbing, with alcohol-based antiseptics must be at least 20 to 40 seconds.                                                                                                                                                                                                                                                                                     |                              |   |   |   |   |                                          |   |   |   |   |
| <b>2. Glove usage:</b> Providing hand hygiene before and after glove use..                                                                                                                                                                                                                                                                                                                                                                                                             |                              |   |   |   |   |                                          |   |   |   |   |
| <b>3. Dry and cracked skin:</b> Side effect of washing with soap and water and/or alcohol-based antiseptic solution due to frequent daily usage.                                                                                                                                                                                                                                                                                                                                       |                              |   |   |   |   |                                          |   |   |   |   |
| <b>4. Workload of the health workers:</b> For all health workers such as nurses and allied health care personnel.                                                                                                                                                                                                                                                                                                                                                                      |                              |   |   |   |   |                                          |   |   |   |   |
| <b>5. Easy to use:</b> Easy access to materials, inability to easily reach the sink, not suitable taps for hand washing.                                                                                                                                                                                                                                                                                                                                                               |                              |   |   |   |   |                                          |   |   |   |   |
| <b>6. Intervention type:</b> Physical contact with patient (handshake, fever measurement, pulse measurement, blood pressure measurement, carrying patient, etc.), physical contact with surrounding environment of the patient (patient beds, linens, tables, chairs, cabinets, etc.), to prevent cross-contamination of different body sites when passing from one process to another in the same patient (urinary catheter, opening intravenous, inserting a nasogastric tube etc.). |                              |   |   |   |   |                                          |   |   |   |   |
| <b>7. Efficiency:</b> More effective than other.                                                                                                                                                                                                                                                                                                                                                                                                                                       |                              |   |   |   |   |                                          |   |   |   |   |



**Supplementary File 1. The Questionnaire utilized in face-to-face interviews to collect expert opinions (continues)**

I. Among the criteria, please mark the choice is more important for the two hand hygiene options.

II. According to your choice, please mark that how many times your choice is more important than the other option (1=equal importance; 9=extreme importance).

| No | Criteria               | I. Which one is more important, A or B? (Please mark with x) |   |       |   | II. How many times more important? (1-9) |     |                         |     |                       |     |                            |     |                        |
|----|------------------------|--------------------------------------------------------------|---|-------|---|------------------------------------------|-----|-------------------------|-----|-----------------------|-----|----------------------------|-----|------------------------|
|    |                        | A                                                            | x | B     | x | Equal importance (1)                     | (2) | Moderate importance (3) | (4) | Strong importance (5) | (6) | Very strong importance (7) | (8) | Extreme importance (9) |
| 1  | Short time application | Antimicrobial Soap and Water                                 |   | ABAS* |   |                                          |     |                         |     |                       |     |                            |     |                        |
| 2  | Glove usage            | Antimicrobial Soap and Water                                 |   | ABAS  |   |                                          |     |                         |     |                       |     |                            |     |                        |
| 3  | Dry and cracked skin   | Antimicrobial Soap and Water                                 |   | ABAS  |   |                                          |     |                         |     |                       |     |                            |     |                        |
| 4  | Workload of the staff  | Antimicrobial Soap and Water                                 |   | ABAS  |   |                                          |     |                         |     |                       |     |                            |     |                        |
| 5  | Easy to use            | Antimicrobial Soap and Water                                 |   | ABAS  |   |                                          |     |                         |     |                       |     |                            |     |                        |
| 6  | Intervention type      | Antimicrobial Soap and Water                                 |   | ABAS  |   |                                          |     |                         |     |                       |     |                            |     |                        |
| 7  | Efficiency             | Antimicrobial Soap and Water                                 |   | ABAS  |   |                                          |     |                         |     |                       |     |                            |     |                        |

\* Alcohol-based antiseptic solution
